# Supplementary material for: A general strategy for direct, enzyme-catalyzed conjugation of functional compounds to DNA
Source: PubMed Central journal article supplement (PMC6009647; doi:10.1093/nar/gky184), 2018-03-13
Supplement: gky184_supplemental_figures.pdf [file gky184_supplemental_figures.pdf]

## A general strategy for direct, enzyme-catalyzed conjugation of functional compounds to DNA

Jochem Deen, Su Wang, Sven Van Snick, Volker Leen, Kris Janssen, Johan Hofkens, and Robert K. Neely

### Supplementary information

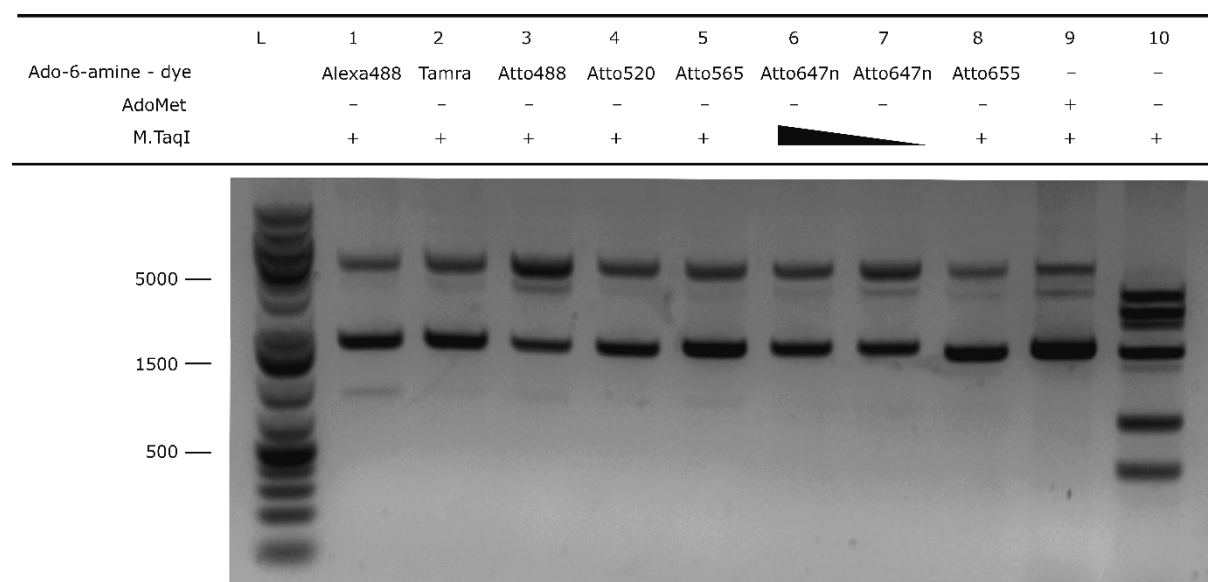

Figure S1: Restriction assay on amine cofactor coupled to one of several NHS-ester dyes. Final concentration of 0.21mg/ml (or 0.14mg/ml for lane 7) of M.TaqI and 200 $\mu$ M of ado-6-amine-dye were used in the reaction.

|                   | L | 1        | 2     | 3       | 4       | 5       | 6        | 7       | 8 | 9 |
|-------------------|---|----------|-------|---------|---------|---------|----------|---------|---|---|
| Ado-6-amine - dye |   | Alexa488 | Tamra | Atto488 | Atto520 | Atto565 | Atto647n | Atto655 | - | - |
| AdoMet            |   | -        | -     | -       | -       | -       | -        | -       | + | - |
| M.TaqI            |   | +        | +     | +       | +       | +       | +        | +       | + | + |

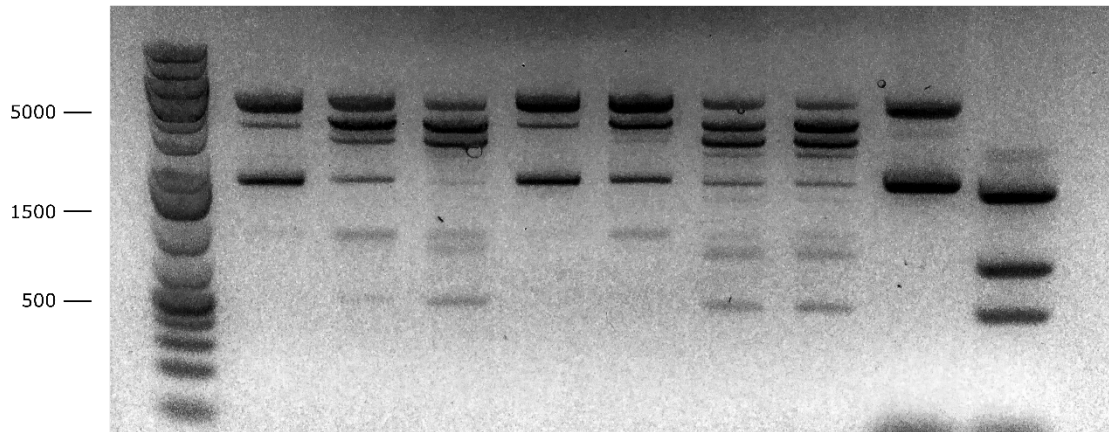

Figure S2: Restriction assay on amine cofactor coupled to one of several NHS-ester dyes. Final concentration of 0.175mg/ml of M.TaqI and 200 $\mu$ M of ado-6-amine-dye were used in the reaction. The lower concentration of M.TaqI used here resulted in only partial protection of the DNA against restriction using some of the dyes.

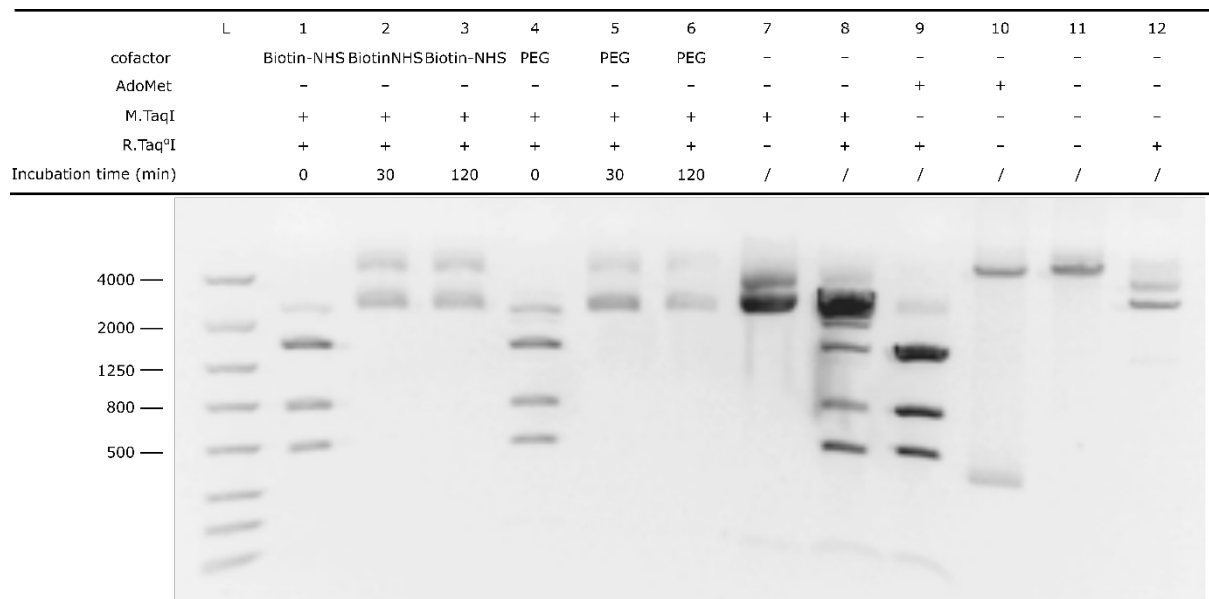

Figure S3: Restriction assay on amine cofactor coupled to biotin or polyethylene glycol (4000MW). A final concentration of 0.175mg/ml of M.TaqI and 200 $\mu$ M of ado-6-amine was used in the reaction.

|                        | L | 1                                                                                 | 2 | 3 | 4 | 5 | 6           | 7 | 8 | 9 | L |
|------------------------|---|-----------------------------------------------------------------------------------|---|---|---|---|-------------|---|---|---|---|
| Ado-6-amine - Atto647N |   | +                                                                                 | + | + | + | + | Ado-6-amine | - | - | - |   |
| AdoMet                 |   | -                                                                                 | - | - | - | - | -           | + | + | - |   |
| M.TaqI                 |   |  |   |   |   |   | +           | + | - | + |   |

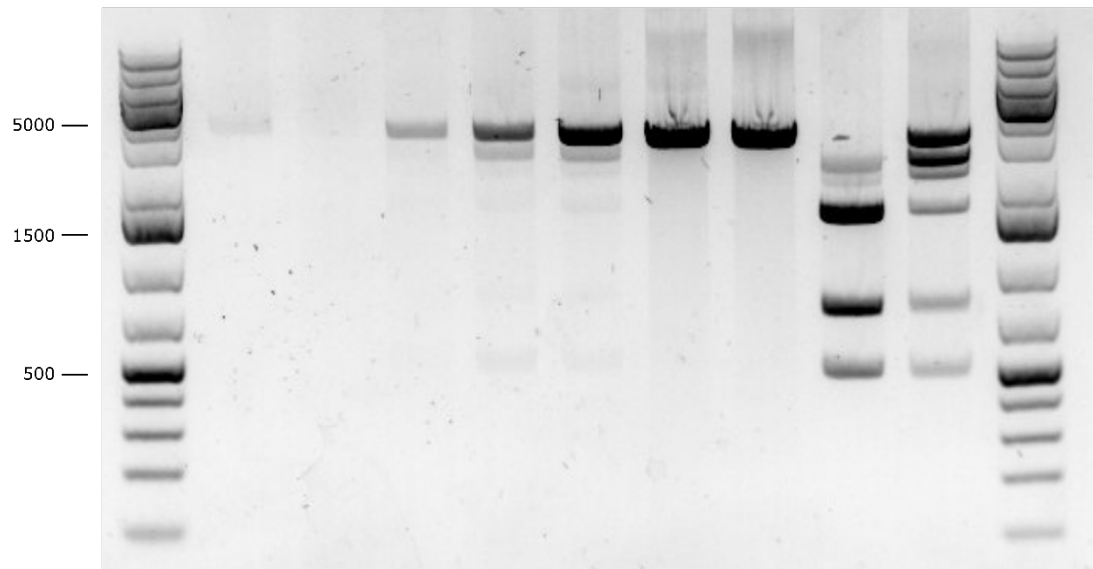

Figure S4: Restriction assay on amine cofactor coupled to Atto647N NHS-ester dye with various M.TaqI methyltransferase concentrations. pUC19 plasmid DNA was linearized by Sall prior to the restriction assay. From lane 1 till lane 5, a 2x dilution series of M.TaqI (final concentration starting from 0.38mg/ml) was performed.

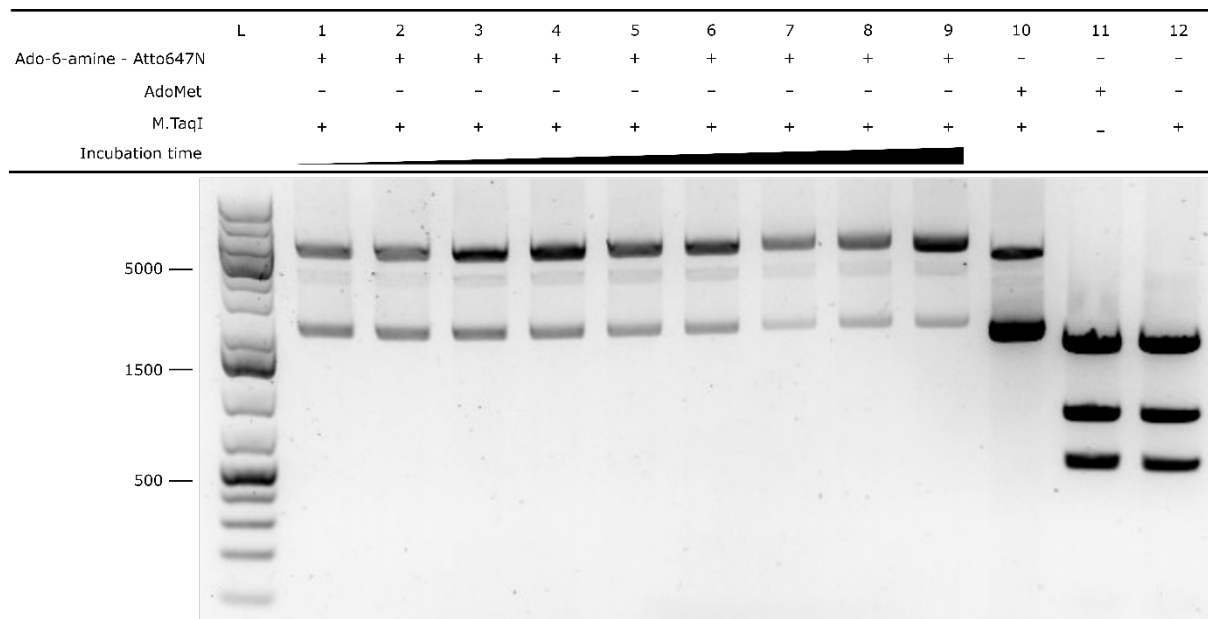

Figure S5: Restriction assay on amine cofactor coupled to Atto647N NHS-ester dye with various incubation time. All the samples were incubated at 60 °C. From lane 1 to lane 9, the incubation times were: 1', 2', 5', 10', 15', 20', 30', 60', and 120' respectively. All the samples showed complete labelling. Final concentration of M.TaqI was 0.24mg/ml.

|                        | L | 1                     | 2 | 3 | 4 | 5 | 6 | 7 | 8 | 9 | 10 | 11 | 12 |
|------------------------|---|-----------------------|---|---|---|---|---|---|---|---|----|----|----|
| Ado-6-amine - Atto647N |   | +                     | + | + | + | + | + | - | - | - | -  | -  | -  |
| AdoMet                 |   | -                     | - | - | - | - | - | + | + | + | +  | -  | -  |
| M.FokI                 |   | [Dilution series bar] |   |   |   |   |   | + | + | - | -  | +  | +  |
| R.FokI                 |   | +                     | + | + | + | + | + | - | + | - | +  | -  | +  |

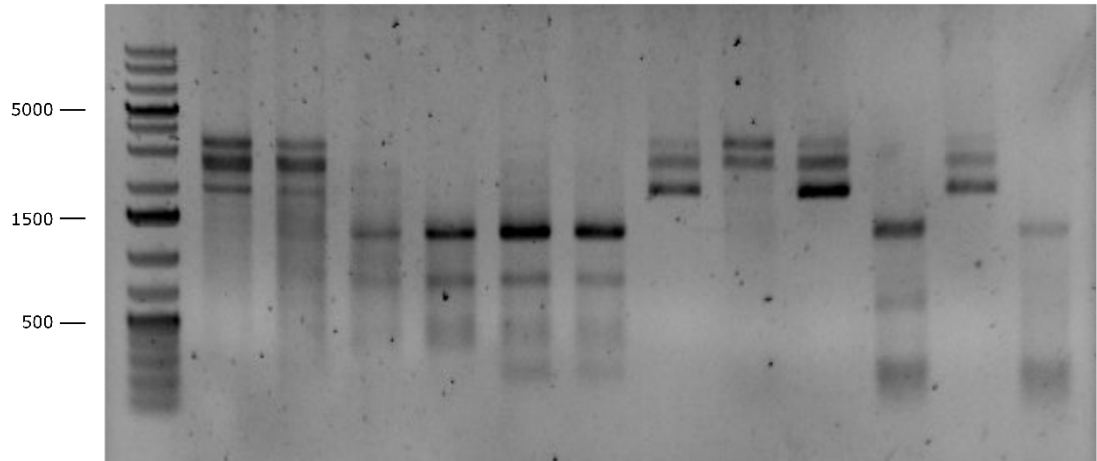

Figure S6: Restriction assay on amine cofactor coupled to Atto647N NHS-ester dye with various M.FokI methyltransferase concentrations. Lanes 1 to 6 show a 2x dilution series of M.FokI (starting concentration from 2.5mg/ml)

|                        | L | 1                                                                                 | 2 | 3 | 4 | 5 |
|------------------------|---|-----------------------------------------------------------------------------------|---|---|---|---|
| Ado-6-amine - Atto647n |   | +                                                                                 | + | - | - | - |
| AdoMet                 |   | -                                                                                 | - | + | + | - |
| M.HhaI                 |   |  |   | + | - | + |

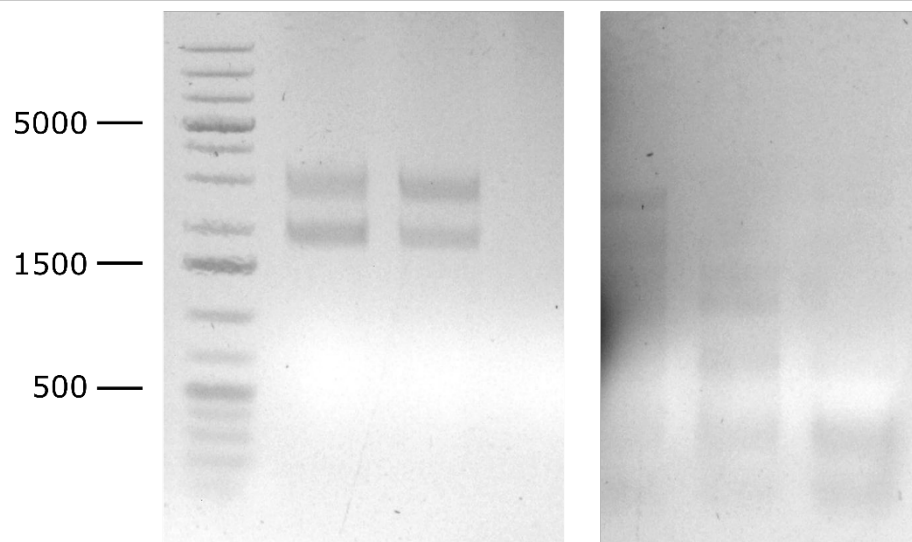

Figure S7: Restriction assay on amine cofactor coupled to Atto647N NHS-ester dye with M.HhaI methyltransferase enzyme. The reaction mixture was incubated at 37 °C, and restricted with R.HhaI. M.HhaI enzyme concentration decreased from lane 1 (final enzyme concentration of 1mg/ml) to lane 2 (final enzyme concentration of 0.78mg/ml). The middle part of the gel was cut out because those were samples from another experiment.

|                        | L | 1                                                                                  | 2 | 3 | 4 | 5 | 6 |
|------------------------|---|------------------------------------------------------------------------------------|---|---|---|---|---|
| Ado-6-amine - Atto647n |   | +                                                                                  | + | + | - | - | - |
| AdoMet                 |   | -                                                                                  | - | - | + | + | - |
| Engineered M.MpeI      |   |  |   |   | + | - | - |

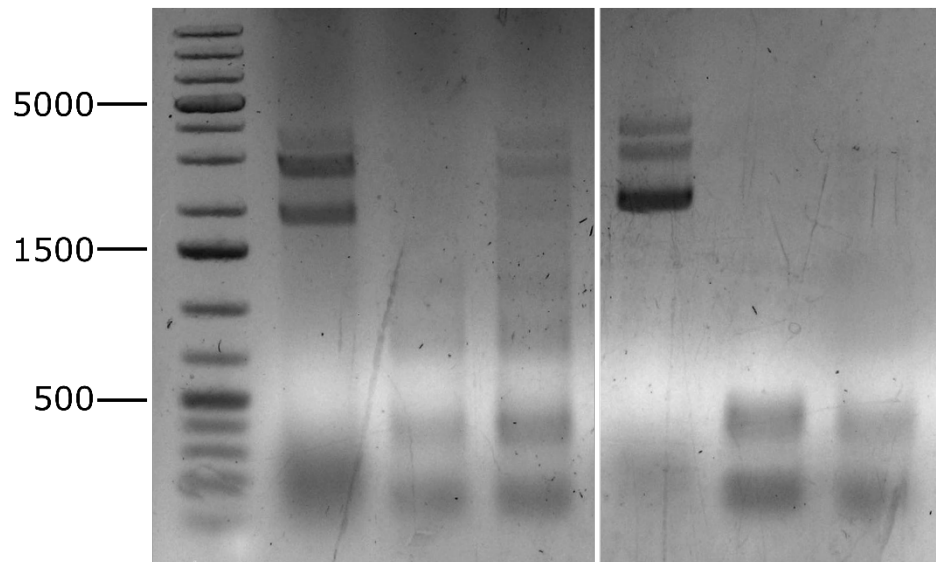

Figure S8: Restriction assay on amine cofactor coupled to Atto647N NHS-ester dye with M.MpeI methyltransferase enzyme. The reaction mixture was incubated at 37 °C, and restricted with R.HhaI. M.MpeI enzyme concentration decreased from lane 1 to lane 3 (0.13mg/ml, 0.09mg/ml, 0.04mg/ml respectively). The middle part of the gel was cut out because those were samples from another experiment.



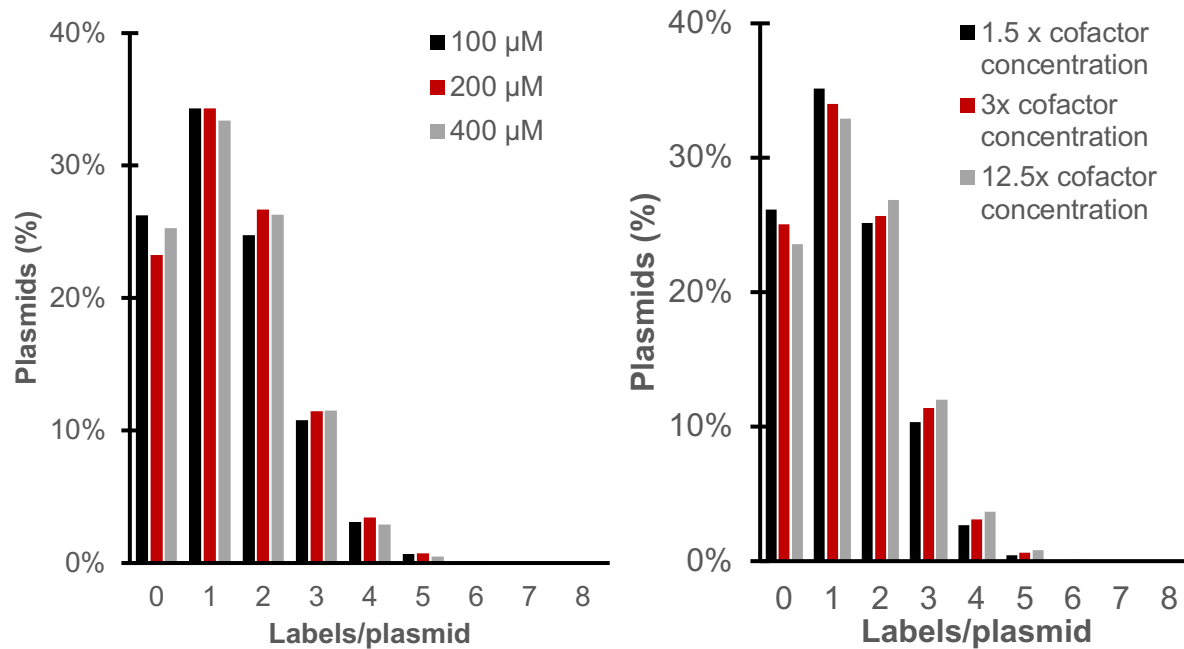

Figure S9: Histogram of number of localized Atto647N labels per pUC19 plasmid for different cofactor concentrations (left) and different dye concentrations (right).

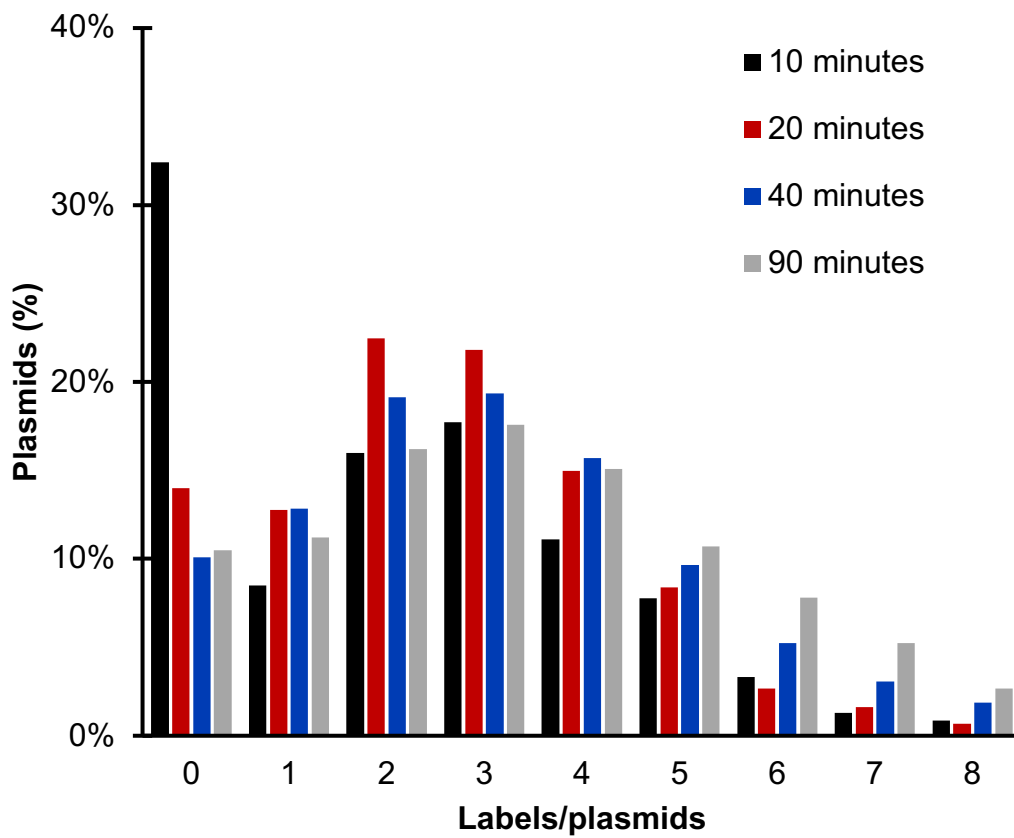

Figure S10: Histogram of number of localized Atto647N labels per pUC19 plasmid with various incubation time between AdoMet analogue and Atto647N NHS ester.

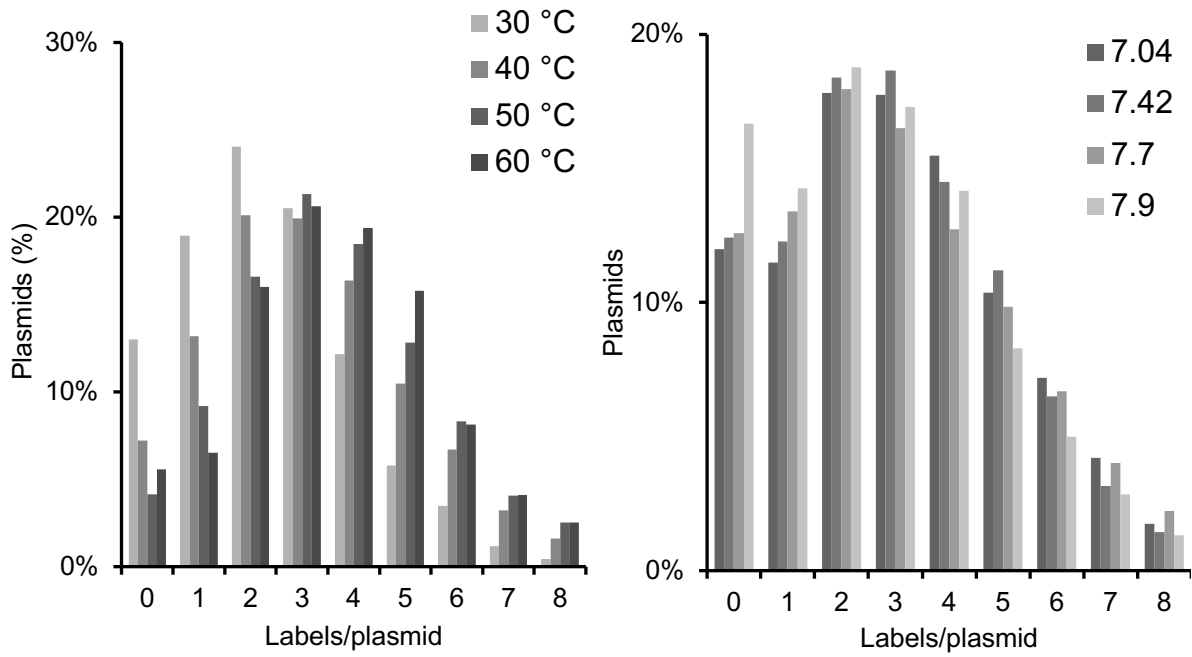

Figure S11: Histogram of number of localized Atto647N labels per pUC19 plasmid at different temperature (left) and different pH (right).

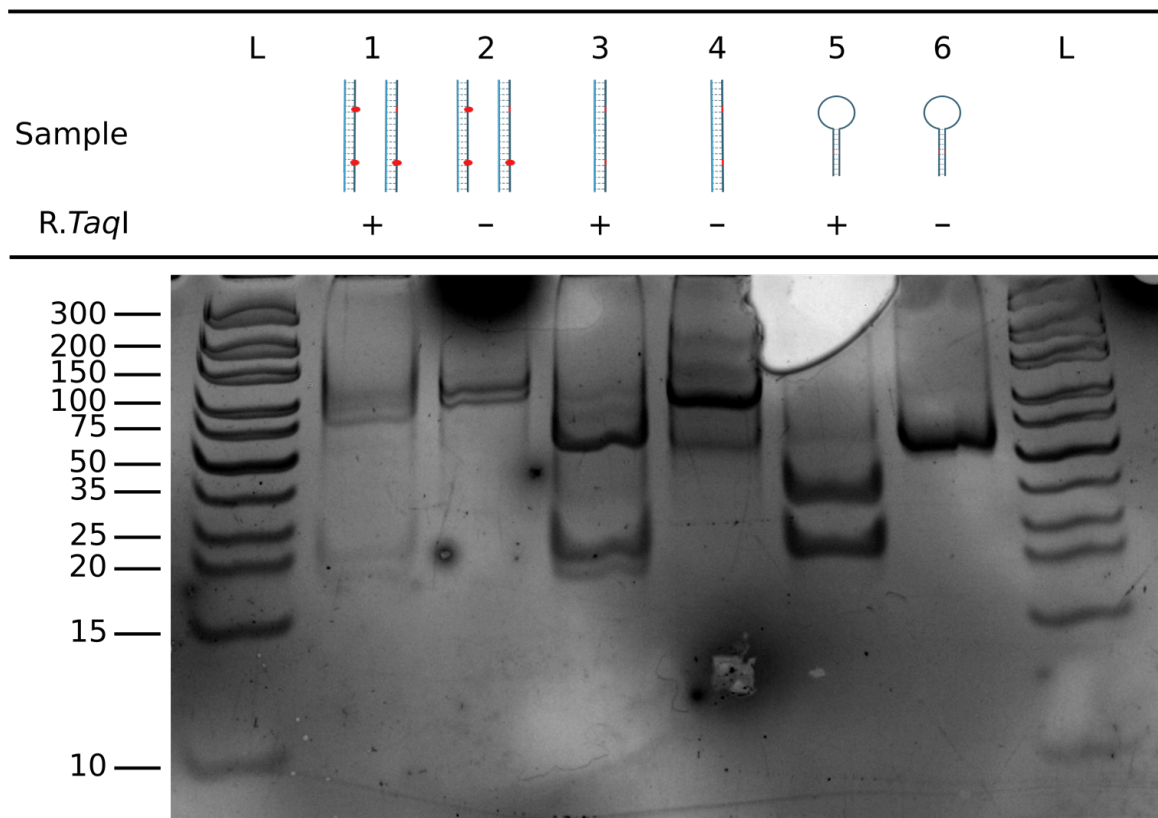

Figure S12: Restriction gel of hairpin experiment. The samples ( $3\mu\text{M}$ ) were labeled with M.TaqI enzyme with a final concentration of  $0.24\text{mg/ml}$  and ado-6-amine-dye concentration of  $0.38\mu\text{M}$ . Lane 1 contains three bands:  $\sim 100\text{bp}$ ,  $\sim 80\text{bp}$  and  $\sim 20\text{bp}$ . They represent undigested DNA molecule (double strand labeled hairpin), the big part and the small part of one-cut DNA molecule (single strand labeled hairpin). Lane 2 is the same sample without restriction. Lane 3 till lane 6 are controls. The lowest band in lane 4 shows the hairpin instead of double strand molecule.

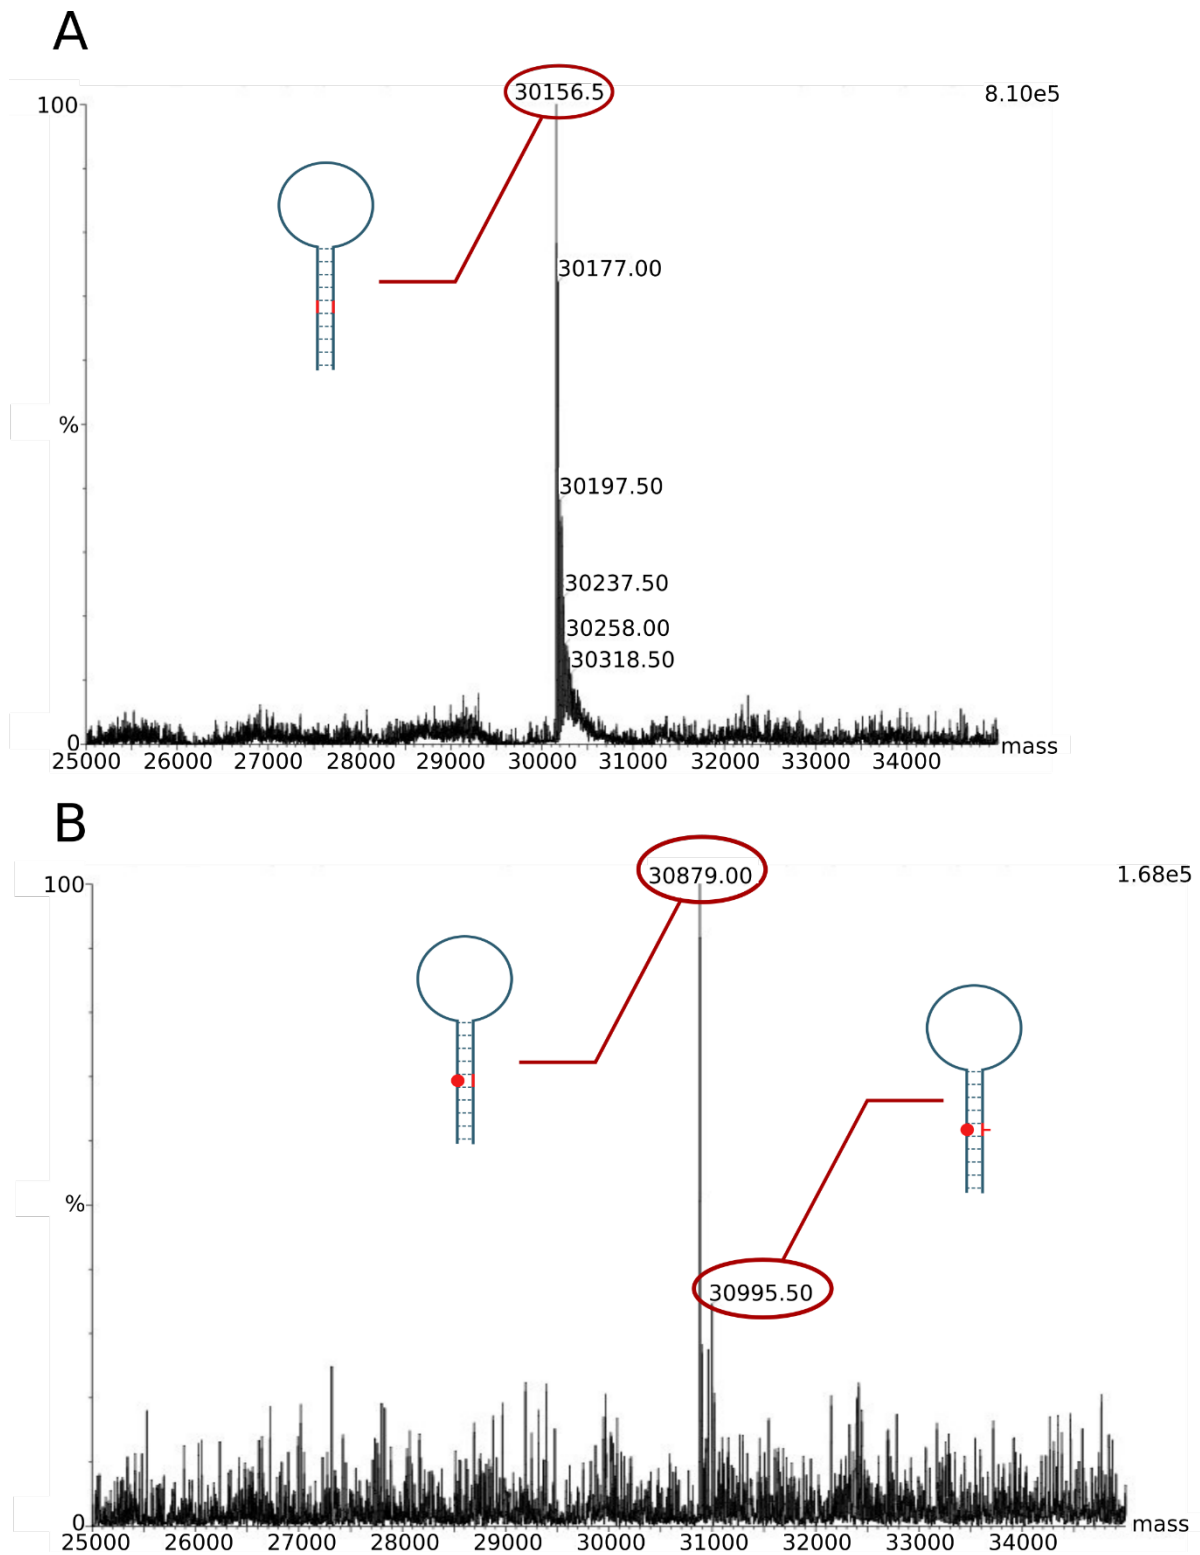

Figure S13: Mass spectra of unlabeled and labeled and hairpins. A: The mass spectrum of unlabeled hairpin. B: The mass spectrum of labeled hairpin. The unlabelled hairpin has a mass of 30156 Da, the labelled hairpin has two populations with mass of 30879 Da and 30995.5 Da respectively. The major peak in B corresponds to the hairpin plus Atto647N (628.9 Da) and ado-6-amine linker (96.2 Da), 30880.6 Da. The mass difference between the minor peak and major peak in figure B is 116.6, this corresponds to the mass of the addition of the ado-6-amine sidechain plus a sodium ion (which is present in the buffer).
